# Supplementary material for: Profiling non-coding RNA levels with clinical classifiers in pediatric Crohn’s disease
Source: BMC Med Genomics. 2021 Jul 29;14:194. doi: 10.1186/s12920-021-01041-7 (PMC8323253; doi:10.1186/s12920-021-01041-7)
Supplement: Supplementary file 1 — Additional file 1: Table S1. List of fifteen types of non-coding RNAs categorization based upon their length of nucleotides. [file 12920_2021_1041_MOESM1_ESM.xlsx]

## Sheet: Table S1
Additional File Table S1: Types of ncRNAs
Type of ncRNA	n	Length in Nucleotides	Definition
3-prime-overlapping	31	> 200	Transcripts that overlap the 3’UTR region of a protein-coding locus on the same strand
antisense	5392	> 200	Transcripts that overlap the genomic span of exons or introns of a protein-coding locus on the opposite strand
bi-directional promoter lncRNA	47	< 200	Transcripts lacking coding potential that originates from within the promoter region of a protein-coding gene, with transcription proceeding in the opposite direction on the corresponding strand
lincRNA	7298	> 200	Transcripts that lack protein-coding potential and are poorly conserved across species
macro-lncRNA	1	> 200	Transcripts that are several kilobases in size due to lack of splicing
miRNA	1761	< 200	ncRNA transcripts containing lengths lesser than 22 nucleotides
miscRNA	2105	< 200	ncRNAs that cannot be categorized into other RNA-categories
rRNA	514	< 200	Ribosomal RNAs
scaRNA	48	< 200	(Small-Cajal-body-specific RNA) Small nucleolar RNAs that are specifically localized to the cajal body, biogenesis site for small nuclear ribonucleoproteins
scRNA	1	< 200	Small-Conditional (scRNA) RNAs manipulated through conformational changes to perform specific functions
sense-intronic	882	< 200	Transcripts comprised of introns of a particular coding gene that do not overlap any exons
snoRNA	894	< 200	Short length small nucleolar RNAs
snRNA	1799	< 200	Short length small nuclear RNAs
sRNA	5	< 200	Small ncRNAs produced by bacterial species often highly structured containing several stem-loops
vaultRNA	1	< 200	Short length ncRNAs that constitute part of the vault ribonucleoprotein complex
