# Supplementary material for: Profiling non-coding RNA levels with clinical classifiers in pediatric Crohn’s disease
Source: BMC Med Genomics. 2021 Jul 29;14:194. doi: 10.1186/s12920-021-01041-7 (PMC8323253; doi:10.1186/s12920-021-01041-7)
Supplement: Supplementary file 6 — Additional file 6: Table S5. Using TopGO with input of 41 DEncRNAs in rectal samples from CD versus controls, 36 pathways were observed. Of which, 7 were molecular function, 12 were cellular, and 17 biological processes. [file 12920_2021_1041_MOESM6_ESM.xlsx]

## Sheet: Table S5
Additional File Table S5: Rectum Gene Ontology
Molecular	GO.ID	Term	Annotated	Significant	Expected	FDR
	GO:0046907	intracellular transport	11	2	0.13	0.0068	BHLHE40-AS1	LMF1
	GO:0015031	protein transport	27	2	0.32	0.0387	BHLHE40-AS1	LMF1
	GO:0045184	establishment of protein localization	27	2	0.32	0.0387	BHLHE40-AS1	LMF1
	GO:0071705	nitrogen compound transport	27	2	0.32	0.0387	BHLHE40-AS1	LMF1
	GO:0015833	peptide transport	27	2	0.32	0.0387	BHLHE40-AS1	LMF1
	GO:0042886	amide transport	27	2	0.32	0.0387	BHLHE40-AS1	LMF1
	GO:0008104	protein localization	29	2	0.35	0.0442	BHLHE40-AS1	LMF1
Biological	GO.ID	Term	Annotated	Significant	Expected	FDR
	GO:0050789	regulation of biological process	520	15	9.81	0.013	HOXA11-AS	KCNQ1OT1	LMF1	MALAT1	MEG3	MIR145	MIR155HG	MIR186	MIR200A	MIR200B	MIR34AHG	MIR429	MIR600HG	MIRLET7BHG	NEAT1
	GO:0065007	biological regulation	520	15	9.81	0.013	HOXA11-AS	KCNQ1OT1	LMF1	MALAT1	MEG3	MIR145	MIR155HG	MIR186	MIR200A	MIR200B	MIR34AHG	MIR429	MIR600HG	MIRLET7BHG	NEAT1
	GO:0071417	cellular response to organonitrogen compound	10	2	0.19	0.014	MIR145	MIR200A
	GO:1901699	cellular response to nitrogen compound	10	2	0.19	0.014	MIR145	MIR200A
	GO:1901653	cellular response to peptide	10	2	0.19	0.014	MIR145	MIR200A
	GO:0046907	intracellular transport	11	2	0.21	0.017	LMF1	RN7SL2
	GO:1901652	response to peptide	12	2	0.23	0.02	MIR145	MIR200A
	GO:0050794	regulation of cellular process	208	8	3.92	0.027	KCNQ1OT1	LMF1	MALAT1	MEG3	MIR145	MIR200A	MIR200B	NEAT1
	GO:1905207	regulation of cardiocyte differentiation	15	2	0.28	0.031	MIR145	MIR200B
	GO:0051649	establishment of localization in cell	15	2	0.28	0.031	LMF1	RN7SL2
	GO:1901698	response to nitrogen compound	16	2	0.3	0.035	MIR145	MIR200A
	GO:0010243	response to organonitrogen compound	16	2	0.3	0.035	MIR145	MIR200A
	GO:0019222	regulation of metabolic process	510	14	9.62	0.035	HOXA11-AS	KCNQ1OT1	LMF1	MEG3	MIR145	MIR155HG	MIR186	MIR200A	MIR200B	MIR34AHG	MIR429	MIR600HG	MIRLET7BHG	NEAT1
	GO:0051179	localization	142	6	2.68	0.04	LMF1	MALAT1	MIR145	MIR200A	MIR200B	RN7SL2
	GO:0040008	regulation of growth	18	2	0.34	0.043	MEG3	MIR200B
	GO:0051641	cellular localization	18	2	0.34	0.043	LMF1	RN7SL2
	GO:0007517	muscle organ development	19	2	0.36	0.048	MIR145	MIR200B
Cellular	GO.ID	Term	Annotated	Significant	Expected	FDR
	GO:0046907	intracellular transport	11	2	0.09	0.0029	RN7SL2	RN7SL3
	GO:0034613	cellular protein localization	11	2	0.09	0.0029	RN7SL2	RN7SL3
	GO:0045184	establishment of protein localization	27	2	0.21	0.0176	RN7SL2	RN7SL3
	GO:0042886	amide transport	27	2	0.21	0.0176	RN7SL2	RN7SL3
	GO:0071705	nitrogen compound transport	27	2	0.21	0.0176	RN7SL2	RN7SL3
	GO:0015833	peptide transport	27	2	0.21	0.0176	RN7SL2	RN7SL3
	GO:0015031	protein transport	27	2	0.21	0.0176	RN7SL2	RN7SL3
	GO:0016043	cellular component organization	92	3	0.73	0.0295	KCNQ1OT1	RN7SL2	RN7SL3
	GO:0071840	cellular component organization or biogenesis	93	3	0.74	0.0303	KCNQ1OT1	RN7SL2	RN7SL3
	GO:0071702	organic substance transport	43	2	0.34	0.0424	RN7SL2	RN7SL3
	GO:0034622	cellular protein-containing complex assembly	46	2	0.37	0.048	RN7SL2	RN7SL3
	GO:0065003	protein-containing complex assembly	47	2	0.37	0.0499	RN7SL2	RN7SL3
