# Supplementary material for: Profiling non-coding RNA levels with clinical classifiers in pediatric Crohn’s disease
Source: BMC Med Genomics. 2021 Jul 29;14:194. doi: 10.1186/s12920-021-01041-7 (PMC8323253; doi:10.1186/s12920-021-01041-7)
Supplement: Supplementary file 7 — Additional file 7: Table S6. Ileum Disease Behavior DEncRNAs. DE analysis results for ileal (n = 345) biopsies by comparing disease behavior against controls and among CD disease behaviors. All FDR significant DEncRNAs with log2FC > 1 and nominally significant (P < 0.05) are listed, B1 versus controls (n = 70), B2 versus controls (n = 124), and B3 versus controls (n = 22). [file 12920_2021_1041_MOESM7_ESM.xlsx]

## Sheet: Table S6
Additional File Table S6: Ileum Montreal DEncRNAs
B1 vs Controls			B2 vs Controls			B3 vs Controls
Name	log2FoldChange	padj	Name	log2FoldChange	padj	Name	log2FoldChange	padj
CTB-61M7.2	-4.609	4e-23	CTB-61M7.2	-5.091	7.15e-20	RP11-701P16.5	-2.574	0.000171022
RP11-701P16.5	-3.979	1.04e-17	RP11-116O18.1	-5.091	7.15e-20	CTB-61M7.2	-1.954	0.000944055
CTC-490G23.2	-3.322	2.28e-11	RP11-701P16.5	-4.969	3.67e-18	RP11-536O18.2	-1.92	0.00037625
RP11-138C24.1	-3.266	8.12e-14	RP11-798K3.2	-4.969	3.67e-18	RP11-213H15.3	-1.86	0.000840706
MAP3K20-AS1	-3.133	3.17e-20	RP11-213H15.3	-4.361	7.15e-20	RP11-701P16.4	-1.675	0.000283202
RP11-213H15.3	-3.059	2.3e-16	RP11-94C24.13	-4.361	7.15e-20	LINC00960	-1.615	0.000374804
HOTTIP	-2.837	2.51e-06	RP11-536O18.2	-4.047	3.32e-25	RP11-419K12.2	-1.588	0.000839099
LINC01272	-2.802	1.36e-23	RP4-724E13.2	-4.047	3.32e-25	LINC01272	-1.519	0.00434282
RP11-536O18.2	-2.658	4.55e-19	RP11-208N14.5	-3.999	1.32e-20	RP11-208N14.5	-1.452	0.00388344
LINC01127	-2.657	5.71e-21	U73167.7	-3.999	1.32e-20	LINC01127	-1.424	0.00133274
FAM225A	-2.529	1.62e-36	RP11-138C24.1	-3.971	1.44e-12	RP11-324E6.6	-1.302	0.00210324
RP11-115D19.1	-2.372	2.52e-16	CTB-127C13.1	-3.971	1.44e-12	RP11-439A17.9	-1.221	0.00412157
RP11-208N14.5	-2.341	6.99e-13	AC016735.2	-3.565	1.56e-14	RP5-884M6.1	-1.213	0.0013248
AC016735.2	-2.28	6.12e-11	CTA-243E7.1	-3.565	1.56e-14	RP1-111C20.3	-1.195	0.00101137
HOXA11-AS1	-2.245	8.29e-10	LINC01127	-3.558	6.87e-22	RN7SL2	-1.195	5.1e-11
C12orf36	-2.094	2.3e-11	C6orf123	-3.558	6.87e-22	RP11-125O18.1	-1.156	0.000455999
FAM225B	-2.028	1.75e-24	MAP3K20-AS1	-3.465	2.91e-15	RP11-290F20.1	-1.126	0.000643322
RP11-109E12.1	-1.908	4.69e-34	RP11-320N21.1	-3.465	2.91e-15	RP11-417E7.1	-1.094	0.00340429
RP11-184E9.1	-1.901	7.5e-47	LINC01272	-3.428	5.85e-21	RN7SL368P	-1.091	0.00485738
RP11-143J24.1	-1.896	1.89e-55	CTC-558O2.1	-3.428	5.85e-21	RP11-531H8.2	-1.079	0.000893078
RP11-419K12.2	-1.731	1.11e-07	FAM225A	-2.904	4.54e-27	RF00017	-1.063	0.00329196
RP11-178A10.1	-1.679	3.04e-11	MIR3936	-2.904	4.54e-27	RP11-661A12.5	-1.049	0.00272046
MIR1244-3	-1.653	4.91e-54	RP11-419K12.2	-2.818	4.96e-10	RP11-598F7.5	-1.021	0.00184718
RP11-17H4.2	-1.643	1.55e-16	RP5-1057J7.7	-2.818	4.96e-10
MIR1244-4	-1.624	2.17e-45	RP11-178A10.1	-2.733	5.02e-15
RP11-90D4.2	-1.609	5.31e-15	RP11-119D9.1	-2.733	5.02e-15
CTB-43E15.3	-1.598	1.08e-10	FAM225B	-2.437	1.11e-18
OVCH1-AS1	-1.576	6.51e-65	C3orf66	-2.437	1.11e-18
RP11-875H7.4	-1.537	3.42e-15	LINC00346	-2.24	3.15e-19
RP5-899E9.1	-1.532	6.4e-20	RP11-96D1.6	-2.24	3.15e-19
RP11-44K6.2	-1.489	9.73e-10	RP11-109E12.1	-2.095	2.22e-20
CYTOR	-1.478	4.15e-29	RP11-108L7.15	-2.095	2.22e-20
RP11-734K23.9	-1.474	2.63e-31	RP11-44K6.2	-2.037	1.08e-08
LINC00346	-1.444	3.63e-16	AC007126.1	-2.037	1.08e-08
RP11-1399P15.1	-1.442	7.23e-15	RP11-21C4.1	-2.034	7.53e-13
AC133644.2	-1.421	3.87e-25	RP3-405J10.4	-2.034	7.53e-13
MIR1244-2	-1.393	2.2e-56	CTB-43E15.3	-2.013	3.32e-08
AP001046.5	-1.38	5.22e-17	RP11-77K12.10	-2.013	3.32e-08
SH3PXD2A-AS1	-1.365	3.2e-09	RP11-90D4.2	-1.983	2.98e-11
RP11-492E3.2	-1.362	3.38e-15	RP11-680F8.1	-1.983	2.98e-11
AC017002.1	-1.354	4.19e-19	CYTOR	-1.947	1.25e-24
AC007228.9	-1.311	3.21e-25	MIR200B	-1.947	1.25e-24
RP11-21C4.1	-1.297	4.12e-11	RP11-875H7.4	-1.905	2.52e-11
B3GALT5-AS1	-1.281	6.31e-05	RP11-48O20.4	-1.905	2.52e-11
AC114730.3	-1.253	9.45e-05	RP11-184E9.1	-1.876	5.05e-22
NCRNA00114	-1.251	3.18e-12	RP11-482M8.1	-1.876	5.05e-22
RP11-380P13.1	1.017	1.07e-05	AP001046.5	-1.783	1.66e-13
RP13-497K6.1	1.017	6.44e-06	RP11-96M12.1	-1.783	1.66e-13
CTB-127C13.1	1.072	2.96e-07	AC133644.2	-1.778	5.71e-19
CTC-210G5.1	1.077	1.73e-06	RP11-77K12.10	-1.778	5.71e-19
RP11-817J15.3	1.079	0.00465152	AC068491.1	-1.756	5.05e-22
RP11-94C24.13	1.083	2.62e-11	RP5-1057J7.7	-1.756	5.05e-22
RP3-368B9.2	1.085	4.34e-05	RP11-806H10.4	-1.744	1.53e-09
AC023590.1	1.086	8.98e-11	RP11-108L7.15	-1.744	1.53e-09
RN7SKP22	1.094	2.36e-08	RP11-356C4.4	-1.732	1.49e-07
RP11-566K8.2	1.116	8.91e-12	C3orf66	-1.732	1.49e-07
BCYRN1	1.124	1.23e-11	AC017002.1	-1.696	5.14e-14
RP11-418I22.2	1.184	6.21e-08	RP11-478K15.6	-1.696	5.14e-14
LINC00479	1.21	2.74e-08	RP11-877E17.2	-1.683	2.42e-19
RF00019	1.231	9.97e-15	AC007126.1	-1.683	2.42e-19
RP4-724E13.2	1.242	1.61e-16	SH3PXD2A-AS1	-1.678	2.06e-06
XXyac-YM21GA2.7	1.324	5.3e-09	CTA-315H11.2	-1.678	2.06e-06
RP11-96M12.1	1.332	5.25e-07	KB-1507C5.4	-1.672	1.36e-06
RP11-203B7.2	1.365	3.41e-07	CTA-243E7.1	-1.672	1.36e-06
RP11-354P11.4	1.375	9.86e-12	CTC-490G23.2	-1.623	0.0491062
LINC01595	1.385	0.00020601	CDKN2B-AS1	-1.623	0.0491062
AC007126.1	1.475	1.17e-12	C12orf36	-1.607	0.00120356
RP11-478K15.6	1.503	6.39e-16	RP11-96M12.1	-1.607	0.00120356
RN7SL2	1.556	1.75e-41	RP11-143J24.1	-1.595	1.72e-18
RP11-116O18.1	2.282	7.84e-21	RP11-245G13.2	-1.595	1.72e-18
			AC058791.1	-1.573	2.61e-10
			MIR200B	-1.573	2.61e-10
			RP11-17H4.2	-1.562	4.8e-07
			RP11-119D9.1	-1.562	4.8e-07
			AFAP1-AS1	-1.538	0.00200134
			RP3-405J10.4	-1.538	0.00200134
			RP11-44K6.4	-1.509	3.16e-06
			RP11-478K15.6	-1.509	3.16e-06
			RP5-899E9.1	-1.508	6.52e-09
			RP11-94C24.13	-1.508	6.52e-09
			RP11-638I2.9	-1.501	2.4e-07
			RP11-320N21.1	-1.501	2.4e-07
			OVCH1-AS1	-1.494	2.42e-27
			RN7SL2	-1.494	2.42e-27
			RP11-383H13.1	-1.468	9.46e-14
			AC053503.4	-1.468	9.46e-14
			RP11-1399P15.1	-1.457	5.68e-07
			AC019349.2	-1.457	5.68e-07
			AC016831.7	-1.452	1.67e-07
			RP11-798K3.2	-1.452	1.67e-07
			AC018816.4	-1.431	1.09e-14
			AC019349.2	-1.431	1.09e-14
			MIR1244-3	-1.424	5.71e-19
			RP11-439C15.5	-1.424	5.71e-19
			HOXA11-AS1	-1.407	0.0264211
			CTB-127C13.1	-1.407	0.0264211
			CTA-384D8.36	-1.4	1.11e-10
			MIR3936	-1.4	1.11e-10
			RP3-428L16.2	-1.395	5.1e-11
			RN7SL2	-1.395	5.1e-11
			RP11-202P11.1	-1.385	5.89e-10
			RP11-1334A24.6	-1.385	1.49e-07
			C6orf123	-1.385	5.89e-10
			RP11-245G13.2	-1.385	1.49e-07
			RP11-316P17.2	-1.373	1.06e-09
			U73167.7	-1.373	1.06e-09
			RP11-792D21.2	-1.372	8.02e-12
			CDKN2B-AS1	-1.372	8.02e-12
			RP11-54A4.2	-1.352	8.35e-08
			RP11-439C15.5	-1.352	8.35e-08
			C12orf61	-1.338	6.27e-10
			CTC-558O2.1	-1.338	6.27e-10
			MIR1244-4	-1.333	3.26e-14
			CTA-315H11.2	-1.333	3.26e-14
			AC133109.1	-1.328	1.77e-08
			RP11-96D1.6	-1.328	1.77e-08
			RP11-82L18.2	-1.316	8.89e-06
			AC053503.4	-1.316	8.89e-06
			MIR34AHG	-1.284	4.46e-09
			RP11-116O18.1	-1.284	4.46e-09
			RP11-253E3.3	-1.251	2.86e-10
			RP11-482M8.1	-1.251	2.86e-10
			CTD-3035K23.7	-1.25	1.56e-10
			RP4-724E13.2	-1.25	1.56e-10
