# Supplementary material for: Profiling non-coding RNA levels with clinical classifiers in pediatric Crohn’s disease
Source: BMC Med Genomics. 2021 Jul 29;14:194. doi: 10.1186/s12920-021-01041-7 (PMC8323253; doi:10.1186/s12920-021-01041-7)
Supplement: Supplementary file 8 — Additional file 8: Table S7. Rectum Disease Behavior DEncRNAs: DE analysis results for rectal (n = 390) biopsies by comparing disease behavior against controls and among CD disease behaviors. All FDR significant DEncRNAs and nominally significant (P < 0.05) are listed, B1 versus controls (n = 23), B2 versus controls (n = 9), and B3 versus controls (n = 14). [file 12920_2021_1041_MOESM8_ESM.xlsx]

## Sheet: Table S7
Additional File Table S7: Rectum Montreal DEncRNAs
B1 vs Controls			B2 vs Controls			B3 vs Controls
Name	log2FoldChange	padj	Name	log2FoldChange	padj	Name	log2FoldChange	padj
RN7SL2	1.395	0	RN7SL2	1.517	0	RP11-143J24.1	-1.76	3.93e-17
RP11-283C24.1	-1.782	5.27e-18	RP11-184E9.1	-1.559	3.81e-15	RP11-184E9.1	-1.689	1.1e-12
RP11-184E9.1	-1.719	1.59e-29	AC007228.9	-1.528	6.9e-15	AC007228.9	-1.528	3.17e-10
RP11-143J24.1	-1.66	9.44e-34	RP11-143J24.1	-1.468	2.85e-16	RP11-283C24.1	-1.512	2.62e-05
FAM225A	-1.596	3.81e-14	RP11-79H23.3	-1.406	1.18e-05	RP11-734K23.9	-1.405	7.96e-11
AC104135.4	-1.579	6.41e-06	OVCH1-AS1	-1.32	1.51e-22	OVCH1-AS1	-1.369	4.4e-17
RP11-79H23.3	-1.571	3.94e-12	RP11-734K23.9	-1.295	3.09e-13	MIR1244-3	-1.305	3.22e-10
RP11-527H14.2	-1.465	3.59e-08	RP11-283C24.1	-1.293	1.94e-05	MIR1244-4	-1.205	2.6e-09
AC007228.9	-1.463	1.17e-22	RP5-881L22.4	-1.279	0.0115589	MIR1244-2	-1.156	2.23e-12
OVCH1-AS1	-1.434	5.53e-43				FAM225A	-1.077	0.0262978
RP11-734K23.9	-1.424	3.12e-27				RP11-17H4.2	-1.047	0.00393625
MIR1244-3	-1.398	1.17e-27				RP11-462G2.1	-1.038	0.0297569
RP11-88H9.2	-1.382	1.24e-07				SNHG9	-1.027	4.01e-06
MIR1244-4	-1.228	7.51e-24				AC159540.1	-1.013	7.76e-07
RP11-117B7.1	-1.124	4.67e-14				RN7SL2	1.117	0
AC159540.1	-1.117	2.13e-22
MIR1244-2	-1.091	3.48e-27
RP11-90D4.2	-1.081	4.48e-09
RP11-462G2.1	-1.054	1.31e-06
RP11-806L2.3	-1.041	2.19e-10
AC078937.4	-1.039	5.69e-05
SNHG9	-1.007	8.76e-16
CYTOR	-1.007	1.21e-14
