# Supplementary material for: Profiling non-coding RNA levels with clinical classifiers in pediatric Crohn’s disease
Source: BMC Med Genomics. 2021 Jul 29;14:194. doi: 10.1186/s12920-021-01041-7 (PMC8323253; doi:10.1186/s12920-021-01041-7)
Supplement: Supplementary file 12 — Additional file 12: Table S11. Using RandomForest, n = 274 ileal patients were randomly split into equal number of samples, n = 14 B1 and n = 14 B2. These were further aliquoted into test and train datasets for cross-validation of AUC with n = 13,777 ncRNAs, base mean greater than n > 10.00. The input included n = 14 B1 and n = 14 B2 used to test disease versus controls status by evaluating model and test for accuracy based on sensitivities and specificity. [file 12920_2021_1041_MOESM12_ESM.xlsx]

## Sheet: Table S11
Table S11: Cross-Validation Summary of Ileal Disease Behavior: B1 vs B2
	Train	Test	Observed	Predicted	Accuracy (B1)	Accuracy (B2)	AUC
B1	7	7	7	6	0.857143	0.714286	0.6531
B2	7	7	7	5
	Train	Test	Observed	Predicted	Accuracy (B1)	Accuracy (B2)	AUC
B1	6	8	8	5	0.625	0.166667	0.4792
B2	8	6	6	1
	Train	Test	Observed	Predicted	Accuracy (B1)	Accuracy (B2)	AUC
B1	8	6	6	5	0.833333	0.75	0.9479
B2	6	8	8	6
	Train	Test	Observed	Predicted	Accuracy (B1)	Accuracy (B2)	AUC
B1	7	7	7	6	0.857143	0.571429	0.7449
B2	7	7	7	4
	Train	Test	Observed	Predicted	Accuracy (B1)	Accuracy (B2)	AUC
B1	7	7	7	5	0.714286	0.714286	0.7653
B2	7	7	7	5
Average					0.777381	0.583333	0.71808
