# Supplementary material for: Profiling non-coding RNA levels with clinical classifiers in pediatric Crohn’s disease
Source: BMC Med Genomics. 2021 Jul 29;14:194. doi: 10.1186/s12920-021-01041-7 (PMC8323253; doi:10.1186/s12920-021-01041-7)
Supplement: Supplementary file 16 — Additional file 16: Table S15. Using RandomForest, n = 274 ileal patients were randomly split into equal test and train datasets for cross-validation of AUC with n = 13,777 ncRNAs, base mean greater than n > 10.00. The input included n = 76 non-inflamed (+ L2 = 56) and n = 76 inflamed (L1 = 38, L3 = 38) used to test disease inflammation status by evaluating model and test for accuracy based on sensitivities and specificity. [file 12920_2021_1041_MOESM16_ESM.xlsx]

## Sheet: Table S15
Table S15: Cross-Validation Summary of Ileal Disease Inflammation: Inflamed vs Non-Inflamed+L2
	Train	Test	Observed	Predicted	Accuracy (Inf)	Accuracy (Non-Inf)	AUC
Inf	40	36	36	23	0.638889	0.525	0.6226
Non-Inf	36	40	40	21
	Train	Test	Observed	Predicted	Accuracy (Inf)	Accuracy (Non-Inf)	AUC
Inf	35	41	41	27	0.658537	0.514286	0.6017
Non-Inf	41	35	35	18
	Train	Test	Observed	Predicted	Accuracy (Inf)	Accuracy (Non-Inf)	AUC
Inf	39	37	37	22	0.594595	0.615385	0.6823
Non-Inf	37	39	39	24
	Train	Test	Observed	Predicted	Accuracy (Inf)	Accuracy (Non-Inf)	AUC
Inf	37	39	39	9	0.230769	0.783784	0.6015
Non-Inf	39	37	37	29
	Train	Test	Observed	Predicted	Accuracy (Inf)	Accuracy (Non-Inf)	AUC
Inf	42	34	34	21	0.617647	0.619048	0.6222
Non-Inf	34	42	42	26
Average					0.548087	0.6115	0.62606
